# Supplementary material for: The effects of oxygen pressure on the discharge performance of potassium–oxygen batteries
Source: Royal Society of Chemistry journal article supplement (doi:10.1039/d2se00182a), 2022-01-01
Supplement: d2se00182a1.pdf [file d2se00182a1.pdf]

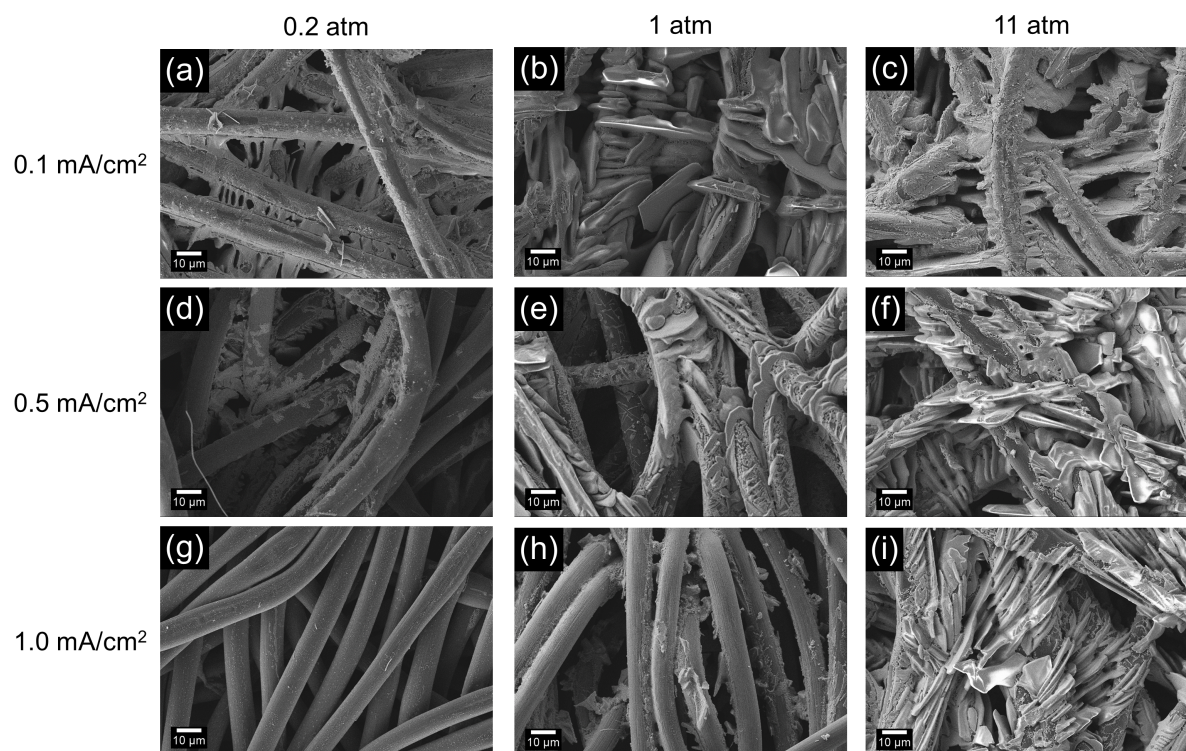

**Figure S1.** SEM images of the O<sub>2</sub> supply-side of cathodes after discharge at different  $J$  and  $p(\text{O}_2)$ . (a-c)  $J = 0.1 \text{ mA/cm}^2$ . (d-f)  $J = 0.5 \text{ mA/cm}^2$ . (g-i)  $J = 1.0 \text{ mA/cm}^2$ . (a,d,g)  $p(\text{O}_2) = 0.2 \text{ atm}$ . (b,e,h)  $p(\text{O}_2) = 1 \text{ atm}$ . (c,f,i)  $p(\text{O}_2) = 11 \text{ atm}$ .

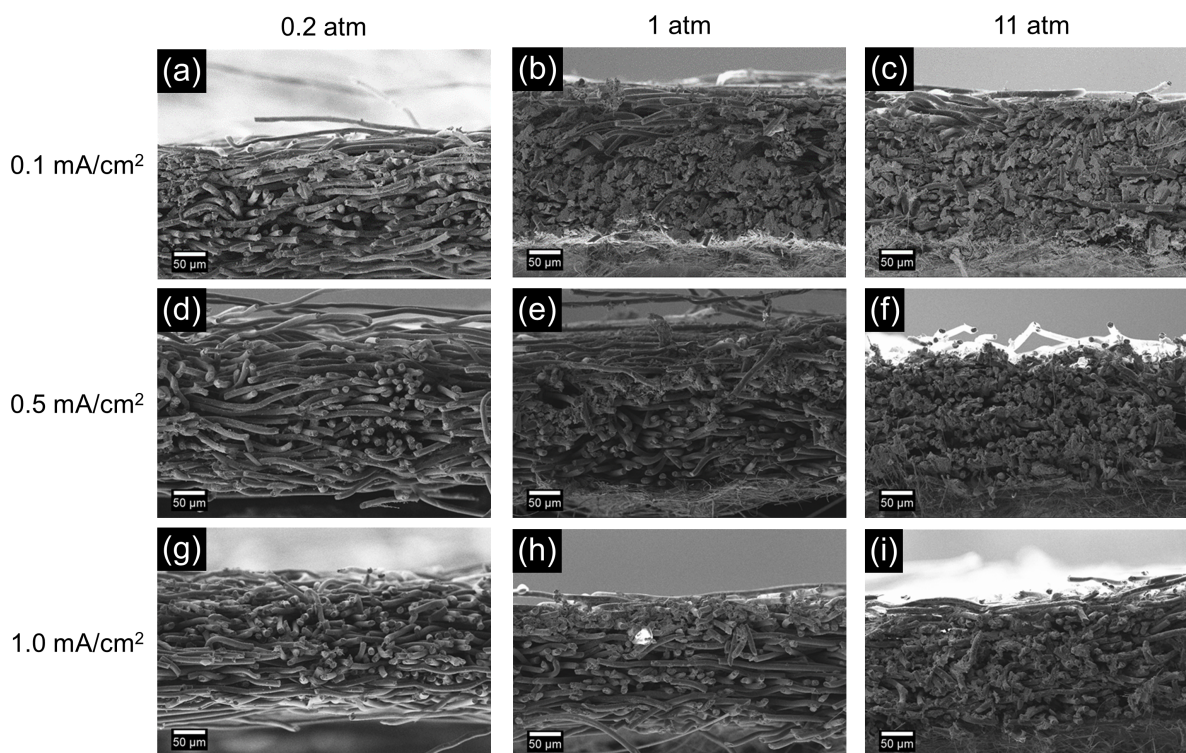

**Figure S2.** SEM images of the cross section of cathodes after discharge at different  $J$  and  $p(\text{O}_2)$ . (a-c)  $J = 0.1 \text{ mA/cm}^2$ . (d-f)  $J = 0.5 \text{ mA/cm}^2$ . (g-i)  $J = 1.0 \text{ mA/cm}^2$ . (a,d,g)  $p(\text{O}_2) = 0.2 \text{ atm}$ . (b,e,h)  $p(\text{O}_2) = 1 \text{ atm}$ . (c,f,i)  $p(\text{O}_2) = 11 \text{ atm}$ .

**Addendum A1.** Calculation of  $O_2/e^-$ 

Only the linear section of the pressure evolution in Fig. 4a was considered for this calculation. The change in oxygen partial pressure ( $\Delta p$ ) is the difference in pressure at the start ( $p_{start}$ ) and end ( $p_{end}$ ) of the linear regime.

$$\Delta p = p_{start} - p_{end} = 2.0232 \text{ atm} - 1.6274 \text{ atm} = 0.39575 \text{ atm} \cdot \frac{101325 \text{ Pa}}{\text{atm}} = 40099 \text{ Pa}$$

The total transferred charge  $\Delta e$  is calculated using  $q$ : absolute capacity,  $Q$ : areal discharge capacity ( $5.5429 \text{ C cm}^{-2}$ ),  $A$ : nominal cathode surface area ( $1.539 \text{ cm}^2$ ),  $F$ : Faraday constant ( $96485 \text{ C mol}^{-1}$ )

$$\Delta e = \frac{Q A}{F}$$

The amount of consumed oxygen  $\Delta n$  is determined using the ideal gas law, where  $R$ : universal gas constant ( $8.3141 \text{ J mol}^{-1} \text{ K}^{-1}$ ),  $T$ : temperature ( $298.15 \text{ K}$ ),  $V$ : Void volume of the cathode compartment ( $5.5 \text{ mL}$ )

$$\Delta n = \frac{\Delta p V}{R T}$$

The ratio of consumed oxygen to total charge transferred  $O_2/e^-$  is obtained by

$$O_2/e^- = \frac{\Delta n}{\Delta e} = \frac{\Delta p V F}{R T Q A} = \frac{40099 \text{ Pa} \cdot 5.5 \cdot 10^{-6} \text{ m}^3 \cdot 96485 \text{ C mol}^{-1}}{8.3141 \text{ J mol}^{-1} \text{ K}^{-1} \cdot 298.15 \text{ K} \cdot 5.5429 \text{ cm}^{-2} \cdot 1.539 \text{ cm}^2} = 1.0$$

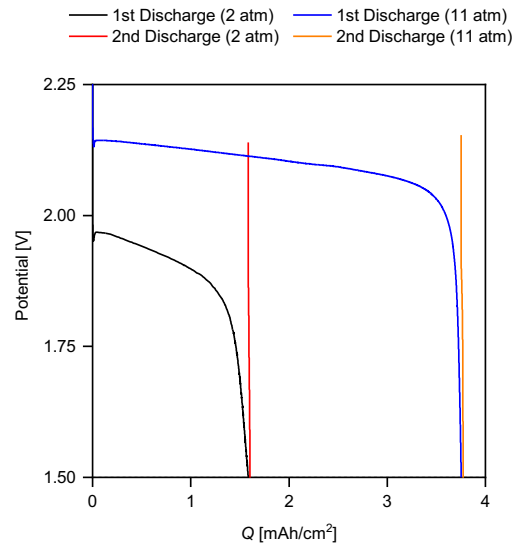

**Figure S3.** Discharge profiles of cells discharged twice at  $J = 1.0 \text{ mA/cm}^2$  with  $p(O_2)$  of 2 atm (black and red lines) and 11 atm (blue and orange lines) with a 30 min rest at open-circuit potential between discharge steps.
